# Supplementary material
Source: PubMed Central journal article supplement (PMC2042178)
Supplement: pnas_0702596104_7.pdf [file pnas_0702596104_7.pdf]

**Table 5. All 179 genes with GO annotations up- and down-regulated by > 1.5 fold**

| Probe                     | Symbol   | Description                                                                                       | Gene Ontology                                                                                                                                                                                          | Pathway                                                                                                                              | Fold |
|---------------------------|----------|---------------------------------------------------------------------------------------------------|--------------------------------------------------------------------------------------------------------------------------------------------------------------------------------------------------------|--------------------------------------------------------------------------------------------------------------------------------------|------|
| <a href="#">243158_at</a> | NT5C2    | 5'-nucleotidase, cytosolic II                                                                     | <a href="#">cytosol</a><br><a href="#">5'-nucleotidase activity</a><br><a href="#">hydrolase activity</a>                                                                                              | <a href="#">Purine metabolism</a><br><a href="#">Pyrimidine metabolism</a><br><a href="#">Nicotinate and nicotinamide metabolism</a> | 4.43 |
| <a href="#">243149_at</a> | EIF4G3   | eukaryotic translation initiation factor 4 gamma, 3                                               | <a href="#">RNA cap bindingtranslation initiation factor activity</a><br><a href="#">regulation of translational initiation</a><br><a href="#">eukaryotic translation initiation factor 4F complex</a> |                                                                                                                                      | 6.38 |
| <a href="#">239238_at</a> | SMARC C1 | SWI/SNF related, matrix associated, actin dependent regulator of chromatin, subfamily c, member 1 | <a href="#">chromatin</a><br><a href="#">chromatin binding</a><br><a href="#">transcription coactivator activity</a><br><a href="#">protein binding</a><br><a href="#">nucleoplasm</a>                 |                                                                                                                                      | 3.49 |

|                           |         |                                    |                                                                                                                                                                                                                                                                                                                                                                                                |                                    |      |
|---------------------------|---------|------------------------------------|------------------------------------------------------------------------------------------------------------------------------------------------------------------------------------------------------------------------------------------------------------------------------------------------------------------------------------------------------------------------------------------------|------------------------------------|------|
|                           |         |                                    | <a href="#">chromatin assembly/disassembly</a><br><a href="#">chromatin remodeling</a><br><a href="#">transcription</a><br><br><a href="#">regulation of transcription from Pol II promoter</a><br><a href="#">SWI/SNF complex</a><br><a href="#">positive regulation of transcription, DNA-dependent</a>                                                                                      |                                    |      |
| <a href="#">236128 at</a> |         |                                    |                                                                                                                                                                                                                                                                                                                                                                                                |                                    | 2.39 |
| <a href="#">232138 at</a> | MBNL2   | muscleblind-like 2 (Drosophila)    | <a href="#">nucleic acid binding</a>                                                                                                                                                                                                                                                                                                                                                           |                                    | 2.71 |
| <a href="#">242695 at</a> |         |                                    |                                                                                                                                                                                                                                                                                                                                                                                                |                                    | 5.66 |
| <a href="#">222266 at</a> | C19orf2 | chromosome 19 open reading frame 2 | <a href="#">transcription corepressor activity</a><br><a href="#">protein binding</a><br><a href="#">nucleus</a><br><a href="#">DNA-directed RNA polymerase II, core complex</a><br><a href="#">cytoplasm</a><br><a href="#">regulation of transcription from Pol II promoter</a><br><a href="#">protein folding</a><br><a href="#">response to virus</a><br><a href="#">prefoldin complex</a> |                                    | 3.94 |
| <a href="#">232528 at</a> | UBE2E3  | ubiquitin-                         | <a href="#">ubiquitin conjugating enzyme activity</a>                                                                                                                                                                                                                                                                                                                                          | <a href="#">Ubiquitin mediated</a> | 3.65 |

|                           |               |                                                  |                                                                                                                                                                                                                                                                                                                                                                                                     |                                              |      |
|---------------------------|---------------|--------------------------------------------------|-----------------------------------------------------------------------------------------------------------------------------------------------------------------------------------------------------------------------------------------------------------------------------------------------------------------------------------------------------------------------------------------------------|----------------------------------------------|------|
|                           |               | conjugating enzyme E2E 3 (UBC4/5 homolog, yeast) | <a href="#">ubiquitin-protein ligase activity</a><br><a href="#">ubiquitin cycle</a><br><a href="#">ligase activity</a>                                                                                                                                                                                                                                                                             | <a href="#">proteolysis</a>                  |      |
| <a href="#">242963 at</a> | MGC26963      |                                                  | <a href="#">Golgi apparatus</a><br><a href="#">integral to plasma membrane</a><br><a href="#">lipid metabolism</a><br><a href="#">sphingolipid metabolism</a><br><a href="#">sphingomyelin biosynthesis</a><br><a href="#">kinase activity</a><br><a href="#">transferase activity</a><br><a href="#">integral to Golgi membrane</a><br><a href="#">ceramide cholinephosphotransferase activity</a> | <a href="#">Glycosphingolipid metabolism</a> | 2.27 |
| <a href="#">229949 at</a> | DKFZP434A0131 |                                                  |                                                                                                                                                                                                                                                                                                                                                                                                     |                                              | 0.37 |
| <a href="#">225417 at</a> | EPC1          | enhancer of polycomb homolog 1 (Drosophila)      | <a href="#">regulation of cell growth</a><br><a href="#">nucleus</a><br><a href="#">transcription</a><br><a href="#">regulation of transcription, DNA-dependent</a><br><a href="#">transcriptional activator activity</a><br><a href="#">transcriptional repressor activity</a><br><a href="#">chromatin modification</a>                                                                           |                                              | 4.59 |

|                            |          |                                                                               |                                                                                                                                                                                                                                                                                                                                                                              |      |
|----------------------------|----------|-------------------------------------------------------------------------------|------------------------------------------------------------------------------------------------------------------------------------------------------------------------------------------------------------------------------------------------------------------------------------------------------------------------------------------------------------------------------|------|
| <a href="#">222348_at</a>  | MAST4    | microtubule associated serine/threonine kinase family member 4                | <a href="#">protein kinase activity</a><br><a href="#">protein serine/threonine kinase activity</a><br><a href="#">calmodulin binding</a><br><a href="#">ATP binding</a><br><a href="#">protein amino acid phosphorylation</a><br><a href="#">transferase activity</a>                                                                                                       | 2.65 |
| <a href="#">234594_at</a>  | ITPK1    | inositol 1,3,4-triphosphate 5/6 kinase                                        | <a href="#">catalytic activity</a><br><a href="#">mitochondrion</a><br><a href="#">signal transduction</a><br><a href="#">kinase activity</a><br><a href="#">ligase activity</a>                                                                                                                                                                                             | 0.32 |
| <a href="#">232356_at</a>  | KIAA0143 |                                                                               | <a href="#">integral to membrane</a>                                                                                                                                                                                                                                                                                                                                         | 4.81 |
| <a href="#">1566903_at</a> | LRP8     | low density lipoprotein receptor-related protein 8, apolipoprotein e receptor | <a href="#">receptor activity</a><br><a href="#">transmembrane receptor activity</a><br><a href="#">transmembrane receptor activity</a><br><a href="#">calcium ion binding</a><br><a href="#">plasma membrane</a><br><a href="#">plasma membrane</a><br><a href="#">proteolysis and peptidolysis</a><br><a href="#">lipid metabolism</a><br><a href="#">lipid metabolism</a> | 0.48 |

|                           |          |                                |                                                                                                                                                                                                                                                                                                                                                                                                                                                                                            |  |      |
|---------------------------|----------|--------------------------------|--------------------------------------------------------------------------------------------------------------------------------------------------------------------------------------------------------------------------------------------------------------------------------------------------------------------------------------------------------------------------------------------------------------------------------------------------------------------------------------------|--|------|
|                           |          |                                | <a href="#">endocytosis</a><br><a href="#">endocytosis</a><br><a href="#">signal transduction</a><br><a href="#">signal transduction</a><br><a href="#">lipoprotein binding</a><br><a href="#">membrane</a><br><a href="#">integral to membrane</a><br><a href="#">cytokine and chemokine mediated signaling pathway</a><br><a href="#">apolipoprotein E receptor activity</a><br><a href="#">apolipoprotein E receptor activity</a><br><a href="#">apolipoprotein E receptor activity</a> |  |      |
| <a href="#">239716 at</a> | TRIM33   | tripartite motif-containing 33 | <a href="#">ubiquitin ligase complex</a><br><a href="#">DNA binding</a><br><a href="#">ubiquitin-protein ligase activity</a><br><a href="#">nucleus</a><br><a href="#">transcription</a><br><a href="#">regulation of transcription, DNA-dependent</a><br><a href="#">zinc ion binding</a><br><a href="#">negative regulation of transcription</a><br><a href="#">protein ubiquitination</a>                                                                                               |  | 4.77 |
| <a href="#">242233 at</a> | KIAA1219 |                                | <a href="#">GTPase activator activity</a>                                                                                                                                                                                                                                                                                                                                                                                                                                                  |  | 2.78 |

|                            |        |                                         |                                                                                                                                                                                                                                                                             |                                                                                                                                                               |      |
|----------------------------|--------|-----------------------------------------|-----------------------------------------------------------------------------------------------------------------------------------------------------------------------------------------------------------------------------------------------------------------------------|---------------------------------------------------------------------------------------------------------------------------------------------------------------|------|
| <a href="#">241769_at</a>  |        |                                         |                                                                                                                                                                                                                                                                             |                                                                                                                                                               | 2.33 |
| <a href="#">1557360_at</a> | LRPPRC | leucine-rich PPR-motif containing       | <a href="#">biological process unknown</a><br><a href="#">single-stranded DNA binding</a><br><a href="#">RNA binding</a><br><a href="#">binding</a><br><a href="#">nucleus</a><br><a href="#">nucleus</a><br><a href="#">mitochondrion</a><br><a href="#">mitochondrion</a> |                                                                                                                                                               | 8.82 |
| <a href="#">230651_at</a>  | THOC2  | THO complex 2                           | <a href="#">nuclear mRNA splicing, via spliceosome</a><br><a href="#">RNA binding</a><br><a href="#">nucleus</a><br><a href="#">mRNA-nucleus export</a><br><a href="#">transport</a>                                                                                        |                                                                                                                                                               | 2.79 |
| <a href="#">230337_at</a>  | SOS1   | son of sevenless homolog 1 (Drosophila) | <a href="#">DNA binding</a><br><a href="#">Ras guanyl-nucleotide exchange factor activity</a><br><a href="#">Rho guanyl-nucleotide exchange factor activity</a><br><a href="#">Rho GTPase activator activity</a><br><a href="#">RAS protein signal transduction</a>         | <a href="#">MAPK signaling pathway</a><br><a href="#">Integrin-mediated cell adhesion</a><br><a href="#">Jak-STAT signaling pathway</a><br><a href="#">NA</a> | 3.45 |
| <a href="#">242287_at</a>  | RSN    | restin (Reed-Steinberg cell-            | <a href="#">nucleic acid binding</a><br><a href="#">endosome</a>                                                                                                                                                                                                            |                                                                                                                                                               | 3.48 |

|                           |      |                                                     |                                                                                                                                                                                                                                                                                                                                  |  |      |
|---------------------------|------|-----------------------------------------------------|----------------------------------------------------------------------------------------------------------------------------------------------------------------------------------------------------------------------------------------------------------------------------------------------------------------------------------|--|------|
|                           |      | expressed intermediate filament-associated protein) | <a href="#">intermediate filament</a><br><a href="#">microtubule binding</a><br><a href="#">microtubule cytoskeleton</a>                                                                                                                                                                                                         |  |      |
| <a href="#">226711 at</a> | HTLF | human T-cell leukemia virus enhancer factor         | <a href="#">transcription factor activity</a><br><a href="#">transcription factor activity</a><br><a href="#">nucleus</a><br><a href="#">transcription</a><br><a href="#">regulation of transcription, DNA-dependent</a>                                                                                                         |  | 2.16 |
| <a href="#">238563 at</a> | ABI1 | abl-interactor 1                                    | <a href="#">soluble fraction</a><br><a href="#">nucleus</a><br><a href="#">endoplasmic reticulum</a><br><a href="#">cytosol</a><br><a href="#">transmembrane receptor protein tyrosine kinase signaling pathway</a><br><a href="#">cytoskeletal protein binding</a><br><a href="#">negative regulation of cell proliferation</a> |  | 3.34 |
| <a href="#">236778 at</a> | ATRX | alpha thalassemia/mental retardation syndrome X-    | <a href="#">DNA binding</a><br><a href="#">DNA helicase activity</a><br><a href="#">transcription factor activity</a><br><a href="#">helicase activity</a>                                                                                                                                                                       |  | 2.89 |

|                              |          |                                       |                                                                                                                                                                                                                                                                                                                                                                                                                              |  |      |
|------------------------------|----------|---------------------------------------|------------------------------------------------------------------------------------------------------------------------------------------------------------------------------------------------------------------------------------------------------------------------------------------------------------------------------------------------------------------------------------------------------------------------------|--|------|
|                              |          | linked (RAD54 homolog, S. cerevisiae) | <a href="#">ATP binding</a><br><a href="#">nucleus</a><br><a href="#">nuclear heterochromatin</a><br><a href="#">DNA repair</a><br><a href="#">DNA methylation</a><br><a href="#">DNA recombination</a><br><a href="#">regulation of transcription, DNA-dependent</a><br><a href="#">chromosome organization and biogenesis (sensu Eukarya)</a><br><a href="#">perception of sound</a><br><a href="#">hydrolase activity</a> |  |      |
| <a href="#">232696_at</a>    | C16orf46 | chromosome 16 open reading frame 46   |                                                                                                                                                                                                                                                                                                                                                                                                                              |  | 0.30 |
| <a href="#">239780_at</a>    |          |                                       |                                                                                                                                                                                                                                                                                                                                                                                                                              |  | 2.33 |
| <a href="#">231087_at</a>    | hSyn     |                                       | <a href="#">binding</a>                                                                                                                                                                                                                                                                                                                                                                                                      |  | 2.81 |
| <a href="#">236703_at</a>    |          |                                       |                                                                                                                                                                                                                                                                                                                                                                                                                              |  | 3.69 |
| <a href="#">1556126_s_at</a> | GPATC2   | G patch domain containing 2           | <a href="#">nucleic acid binding</a><br><a href="#">intracellular</a>                                                                                                                                                                                                                                                                                                                                                        |  | 3.93 |
| <a href="#">243827_at</a>    | TEX27    | testis expressed sequence 27          | <a href="#">DNA binding</a><br><a href="#">zinc ion binding</a>                                                                                                                                                                                                                                                                                                                                                              |  | 2.75 |
| <a href="#">209735_at</a>    | ABCG2    | ATP-binding cassette, sub-            | <a href="#">nucleotide binding</a><br><a href="#">ATP binding</a>                                                                                                                                                                                                                                                                                                                                                            |  | 6.71 |



|                                 |              |                                                     |                                                                                                                                                                                                                                                                                                                                                  |  |      |
|---------------------------------|--------------|-----------------------------------------------------|--------------------------------------------------------------------------------------------------------------------------------------------------------------------------------------------------------------------------------------------------------------------------------------------------------------------------------------------------|--|------|
|                                 |              | family G<br>(WHITE),<br>member 2                    | <a href="#">transport</a><br><a href="#">xenobiotic-transporting ATPase activity</a><br><a href="#">membrane</a><br><a href="#">integral to membrane</a><br><a href="#">ATPase activity</a><br><a href="#">response to drug</a>                                                                                                                  |  |      |
| <a href="#">204700_x<br/>at</a> | MGC298<br>75 |                                                     |                                                                                                                                                                                                                                                                                                                                                  |  | 2.30 |
| <a href="#">242920_at</a>       | KIAA09<br>99 |                                                     | <a href="#">protein serine/threonine kinase activity</a><br><a href="#">ATP binding</a><br><a href="#">protein amino acid phosphorylation</a><br><a href="#">transferase activity</a>                                                                                                                                                            |  | 4.65 |
| <a href="#">243037_at</a>       | FUBP1        | far upstream<br>element (FUSE)<br>binding protein 1 | <a href="#">single-stranded DNA binding</a><br><a href="#">transcription factor activity</a><br><a href="#">nucleus</a><br><a href="#">cytoplasm</a><br><a href="#">transcription</a><br><a href="#">regulation of transcription, DNA-dependent</a><br><a href="#">transcription from Pol II promoter</a><br><a href="#">phosphate transport</a> |  | 1.78 |
| <a href="#">237216_at</a>       | GARNL<br>1   | GTPase<br>activating                                | <a href="#">GTPase activator activity</a><br><a href="#">nucleus</a>                                                                                                                                                                                                                                                                             |  | 3.12 |

|                           |           |                                     |                                                                                                                                                                                                                                                                                                                                                                                                                                                                                                                                                                                                                                                               |                           |      |
|---------------------------|-----------|-------------------------------------|---------------------------------------------------------------------------------------------------------------------------------------------------------------------------------------------------------------------------------------------------------------------------------------------------------------------------------------------------------------------------------------------------------------------------------------------------------------------------------------------------------------------------------------------------------------------------------------------------------------------------------------------------------------|---------------------------|------|
|                           |           | Rap/RanGAP domain-like 1            |                                                                                                                                                                                                                                                                                                                                                                                                                                                                                                                                                                                                                                                               |                           |      |
| <a href="#">240765_at</a> | HCMOG T-1 |                                     |                                                                                                                                                                                                                                                                                                                                                                                                                                                                                                                                                                                                                                                               |                           | 1.85 |
| <a href="#">244165_at</a> | C10orf18  | chromosome 10 open reading frame 18 |                                                                                                                                                                                                                                                                                                                                                                                                                                                                                                                                                                                                                                                               |                           | 2.37 |
| <a href="#">244546_at</a> | CYCS      | cytochrome c, somatic               | <a href="#">protein binding</a><br><a href="#">mitochondrial electron transport chain</a><br><a href="#">mitochondrial intermembrane space</a><br><a href="#">mitochondrial intermembrane space</a><br><a href="#">cytosol</a><br><a href="#">cytosol</a><br><a href="#">electron transport</a><br><a href="#">DNA fragmentation</a><br><a href="#">DNA fragmentation</a><br><a href="#">transport</a><br><a href="#">apoptosis</a><br><a href="#">caspase activation via cytochrome c</a><br><a href="#">caspase activation via cytochrome c</a><br><a href="#">heme binding</a><br><a href="#">electron transporter, transferring electrons from CoQH2-</a> | <a href="#">Apoptosis</a> | 0.23 |

|                             |        |                                        |                                                                                                                                                                                                                                                                                                                                        |                                            |      |
|-----------------------------|--------|----------------------------------------|----------------------------------------------------------------------------------------------------------------------------------------------------------------------------------------------------------------------------------------------------------------------------------------------------------------------------------------|--------------------------------------------|------|
|                             |        |                                        | <a href="#">cytochrome c reductase complex and cytochrome c oxidase complex activity</a><br><a href="#">electron transporter, transferring electrons from CoQH2-cytochrome c reductase complex and cytochrome c oxidase complex activity</a><br><a href="#">cellular respiration</a><br><a href="#">cellular respiration</a>           |                                            |      |
| <a href="#">243450_at</a>   | AKAP13 | A kinase (PRKA) anchor protein 13      | <a href="#">cAMP-dependent protein kinase activity</a><br><a href="#">signal transducer activity</a><br><a href="#">receptor activity</a><br><a href="#">Rho guanyl-nucleotide exchange factor activity</a><br><a href="#">membrane fraction</a><br><a href="#">intracellular signaling cascade</a><br><a href="#">kinase activity</a> |                                            | 3.64 |
| <a href="#">234969_s_at</a> |        |                                        |                                                                                                                                                                                                                                                                                                                                        |                                            | 3.57 |
| <a href="#">244633_at</a>   | PIAS2  | protein inhibitor of activated STAT, 2 | <a href="#">DNA binding</a><br><a href="#">nucleus</a><br><a href="#">transcription</a><br><a href="#">regulation of transcription, DNA-dependent</a><br><a href="#">ubiquitin cycle</a><br><a href="#">development</a>                                                                                                                | <a href="#">Jak-STAT signaling pathway</a> | 2.84 |

|                             |       |                                                                           |                                                                                                                                                                                                                                                                                                                                                                                                                                                                                                                                              |                                                            |      |
|-----------------------------|-------|---------------------------------------------------------------------------|----------------------------------------------------------------------------------------------------------------------------------------------------------------------------------------------------------------------------------------------------------------------------------------------------------------------------------------------------------------------------------------------------------------------------------------------------------------------------------------------------------------------------------------------|------------------------------------------------------------|------|
|                             |       |                                                                           | <a href="#">zinc ion binding</a>                                                                                                                                                                                                                                                                                                                                                                                                                                                                                                             |                                                            |      |
| <a href="#">239227 at</a>   | EXT1  | exostoses<br>(multiple) 1                                                 | <a href="#">skeletal development</a><br><a href="#">endoplasmic reticulum membrane</a><br><a href="#">Golgi apparatus</a><br><a href="#">glycosaminoglycan biosynthesis</a><br><a href="#">cell cycle</a><br><a href="#">signal transduction</a><br><a href="#">membrane</a><br><a href="#">integral to membrane</a><br><a href="#">transferase activity, transferring glycosyl groups</a><br><a href="#">negative regulation of cell cycle</a><br><a href="#">N-acetylglucosaminyl-proteoglycan 4-beta-glucuronosyltransferase activity</a> | <a href="#">Chondroitin / Heparan sulfate biosynthesis</a> | 4.07 |
| <a href="#">216321 s at</a> | NR3C1 | nuclear receptor subfamily 3, group C, member 1 (glucocorticoid receptor) | <a href="#">transcription factor activity</a><br><a href="#">glucocorticoid receptor activity</a><br><a href="#">steroid binding</a><br><a href="#">nucleus</a><br><a href="#">cytoplasm</a><br><a href="#">mitochondrial matrix</a><br><a href="#">regulation of transcription, DNA-dependent</a><br><a href="#">transcription from Pol II promoter</a><br><a href="#">inflammatory response</a>                                                                                                                                            | <a href="#">Neuroactive ligand-receptor interaction</a>    | 5.48 |

|                             |          |                                                                           |                                                                                                                                                                                                                                                                                                                                                                                                                                          |                                                         |      |
|-----------------------------|----------|---------------------------------------------------------------------------|------------------------------------------------------------------------------------------------------------------------------------------------------------------------------------------------------------------------------------------------------------------------------------------------------------------------------------------------------------------------------------------------------------------------------------------|---------------------------------------------------------|------|
|                             |          |                                                                           | <a href="#">signal transduction</a>                                                                                                                                                                                                                                                                                                                                                                                                      |                                                         |      |
| <a href="#">236809_at</a>   | MGC40405 |                                                                           |                                                                                                                                                                                                                                                                                                                                                                                                                                          |                                                         | 3.55 |
| <a href="#">242761_s_at</a> | ZNF420   | zinc finger protein 420                                                   | <a href="#">nucleic acid binding</a><br><a href="#">DNA binding</a><br><a href="#">nucleus</a><br><a href="#">regulation of transcription, DNA-dependent</a><br><a href="#">zinc ion binding</a>                                                                                                                                                                                                                                         |                                                         | 2.56 |
| <a href="#">232431_at</a>   | NR3C1    | nuclear receptor subfamily 3, group C, member 1 (glucocorticoid receptor) | <a href="#">transcription factor activity</a><br><a href="#">glucocorticoid receptor activity</a><br><a href="#">steroid binding</a><br><a href="#">nucleus</a><br><a href="#">cytoplasm</a><br><a href="#">mitochondrial matrix</a><br><a href="#">regulation of transcription, DNA-dependent</a><br><a href="#">transcription from Pol II promoter</a><br><a href="#">inflammatory response</a><br><a href="#">signal transduction</a> | <a href="#">Neuroactive ligand-receptor interaction</a> | 8.48 |
| <a href="#">237006_at</a>   | MLLT2    | myeloid/lymphoid or mixed-lineage leukemia (trithorax                     | <a href="#">transcription factor activity</a><br><a href="#">nucleus</a>                                                                                                                                                                                                                                                                                                                                                                 |                                                         | 4.66 |

|                                 |            |                                                |                                                                                                                                                                                                                                                                                                                                                                                                                                                              |  |      |
|---------------------------------|------------|------------------------------------------------|--------------------------------------------------------------------------------------------------------------------------------------------------------------------------------------------------------------------------------------------------------------------------------------------------------------------------------------------------------------------------------------------------------------------------------------------------------------|--|------|
|                                 |            | homolog,<br>Drosophila),<br>translocated to, 2 |                                                                                                                                                                                                                                                                                                                                                                                                                                                              |  |      |
| <a href="#">227541_at</a>       | WDR20      | WD repeat<br>domain 20                         |                                                                                                                                                                                                                                                                                                                                                                                                                                                              |  | 2.63 |
| <a href="#">202724_s<br/>at</a> | FOXO1<br>A | forkhead box<br>O1A<br>(rhabdomyosarcoma)      | <a href="#">transcription factor activity</a><br><a href="#">nucleus</a><br><a href="#">transcription</a><br><a href="#">regulation of transcription from Pol II promoter</a><br><a href="#">anti-apoptosis</a>                                                                                                                                                                                                                                              |  | 2.56 |
| <a href="#">215786_at</a>       | HBXAP      | hepatitis B virus<br>x associated<br>protein   | <a href="#">DNA binding</a><br><a href="#">nucleus</a><br><a href="#">nucleosome assembly</a><br><a href="#">transcription</a><br><a href="#">transcriptional activator activity</a><br><a href="#">transcriptional repressor activity</a><br><a href="#">chromatin modification</a><br><a href="#">histone binding</a><br><a href="#">negative regulation of transcription, DNA-dependent</a><br><a href="#">positive regulation of viral transcription</a> |  | 2.61 |
| <a href="#">243003_at</a>       | MLLT10     | myeloid/lymphoid<br>or mixed-                  | <a href="#">DNA binding</a><br><a href="#">transcription factor activity</a>                                                                                                                                                                                                                                                                                                                                                                                 |  | 2.24 |

|                                                 |        |                                                                                 |                                                                                                                                                                                                                                               |  |      |
|-------------------------------------------------|--------|---------------------------------------------------------------------------------|-----------------------------------------------------------------------------------------------------------------------------------------------------------------------------------------------------------------------------------------------|--|------|
|                                                 |        | lineage leukemia (trithorax homolog, Drosophila), translocated to, 10           | <a href="#">nucleus</a><br><a href="#">regulation of transcription, DNA-dependent</a>                                                                                                                                                         |  |      |
| <a href="#">1562497 at</a><br><a href="#">t</a> |        |                                                                                 |                                                                                                                                                                                                                                               |  | 3.00 |
| <a href="#">1557432 at</a><br><a href="#">t</a> | RASAL2 | RAS protein activator like 2                                                    | <a href="#">GTPase activator activity</a><br><a href="#">Ras GTPase activator activity</a><br><a href="#">signal transduction</a>                                                                                                             |  | 2.58 |
| <a href="#">242673 at</a>                       | UBE3C  | ubiquitin protein ligase E3C                                                    | <a href="#">protein polyubiquitination</a><br><a href="#">ubiquitin-protein ligase activity</a><br><a href="#">protein binding</a><br><a href="#">intracellular</a><br><a href="#">ubiquitin cycle</a>                                        |  | 4.44 |
| <a href="#">227312 at</a>                       | SNTB2  | syntrophin, beta 2 (dystrophin-associated protein A1, 59kDa, basic component 2) | <a href="#">actin binding</a><br><a href="#">calcium ion binding</a><br><a href="#">calmodulin binding</a><br><a href="#">membrane fraction</a><br><a href="#">cytoskeleton</a><br><a href="#">dystrophin-associated glycoprotein complex</a> |  | 1.91 |

|                             |          |                                       |                                                                                                                                                                                                                                                                                                                                                                |                                                                                                                                                                                                                                              |      |
|-----------------------------|----------|---------------------------------------|----------------------------------------------------------------------------------------------------------------------------------------------------------------------------------------------------------------------------------------------------------------------------------------------------------------------------------------------------------------|----------------------------------------------------------------------------------------------------------------------------------------------------------------------------------------------------------------------------------------------|------|
|                             |          |                                       | <a href="#">membrane</a>                                                                                                                                                                                                                                                                                                                                       |                                                                                                                                                                                                                                              |      |
| <a href="#">235374_at</a>   | MDH1     | malate dehydrogenase 1, NAD (soluble) | <a href="#">L-lactate dehydrogenase activity</a><br><a href="#">malic enzyme activity</a><br><a href="#">cytosol</a><br><a href="#">glycolysis</a><br><a href="#">tricarboxylic acid cycle</a><br><a href="#">malate metabolism</a><br><a href="#">oxidoreductase activity</a><br><a href="#">L-malate dehydrogenase activity</a>                              | <a href="#">Citrate cycle (TCA cycle)</a><br><a href="#">Pyruvate metabolism</a><br><a href="#">Glyoxylate and dicarboxylate metabolism</a><br><a href="#">Carbon fixation</a><br><a href="#">Reductive carboxylate cycle (CO2 fixation)</a> | 1.87 |
| <a href="#">224336_s_at</a> | DUSP16   | dual specificity phosphatase 16       | <a href="#">inactivation of MAPK</a><br><a href="#">nucleus</a><br><a href="#">cytoplasm</a><br><a href="#">protein amino acid dephosphorylation</a><br><a href="#">hydrolase activity</a><br><a href="#">MAP kinase phosphatase activity</a><br><a href="#">MAPK nucleus export</a><br><a href="#">leptomycin B-sensitive MAPK phosphatase nucleus export</a> | <a href="#">MAPK signaling pathway</a>                                                                                                                                                                                                       | 2.82 |
| <a href="#">226208_at</a>   | MGC40405 |                                       |                                                                                                                                                                                                                                                                                                                                                                |                                                                                                                                                                                                                                              | 3.77 |
| <a href="#">213459_at</a>   | RPL37A   | ribosomal protein L37a                | <a href="#">structural constituent of ribosome</a><br><a href="#">ribosome</a><br><a href="#">protein biosynthesis</a>                                                                                                                                                                                                                                         | <a href="#">Ribosome</a>                                                                                                                                                                                                                     | 3.25 |



|                           |               |                                                                                                                                 |                                                                                                                                                                                                                |                                                                                                              |      |
|---------------------------|---------------|---------------------------------------------------------------------------------------------------------------------------------|----------------------------------------------------------------------------------------------------------------------------------------------------------------------------------------------------------------|--------------------------------------------------------------------------------------------------------------|------|
| <a href="#">225957 at</a> | LOC153<br>222 |                                                                                                                                 | <a href="#">DNA binding</a><br><a href="#">nucleus</a><br><a href="#">regulation of transcription, DNA-dependent</a>                                                                                           |                                                                                                              | 2.53 |
| <a href="#">239721 at</a> | UBE2H         | ubiquitin-<br>conjugating<br>enzyme E2H<br>(UBC8 homolog,<br>yeast)                                                             | <a href="#">ubiquitin conjugating enzyme activity</a><br><a href="#">ubiquitin-protein ligase activity</a><br><a href="#">ubiquitin cycle</a><br><a href="#">ligase activity</a>                               |                                                                                                              | 1.72 |
| <a href="#">241786 at</a> | PPP3R1        | protein<br>phosphatase 3<br>(formerly 2B),<br>regulatory<br>subunit B,<br>19kDa, alpha<br>isoform<br>(calcineurin B,<br>type I) | <a href="#">calcium-dependent protein serine/threonine phosphatase activity</a><br><a href="#">calcium ion binding</a><br><a href="#">calmodulin inhibitor activity</a><br><a href="#">calcineurin complex</a> | <a href="#">MAPK signaling pathway</a><br><a href="#">Apoptosis</a><br><a href="#">Wnt signaling pathway</a> | 5.09 |
| <a href="#">218819 at</a> | DDX26         | DEAD/H (Asp-<br>Glu-Ala-Asp/His)<br>box polypeptide<br>26                                                                       | <a href="#">helicase activity</a><br><a href="#">transmembrane receptor activity</a>                                                                                                                           |                                                                                                              | 2.85 |
| <a href="#">242068 at</a> | BIRC6         | baculoviral IAP<br>repeat-containing                                                                                            | <a href="#">ubiquitin conjugating enzyme activity</a><br><a href="#">cysteine protease inhibitor activity</a>                                                                                                  |                                                                                                              | 3.11 |

|                             |               |                                                                             |                                                                                                                                                                    |  |      |
|-----------------------------|---------------|-----------------------------------------------------------------------------|--------------------------------------------------------------------------------------------------------------------------------------------------------------------|--|------|
|                             |               | 6 (apollon)                                                                 | <a href="#">intracellular</a><br><a href="#">ubiquitin cycle</a><br><a href="#">apoptosis</a><br><a href="#">anti-apoptosis</a><br><a href="#">ligase activity</a> |  |      |
| <a href="#">235556_at</a>   |               |                                                                             |                                                                                                                                                                    |  | 2.80 |
| <a href="#">242919_at</a>   | LOC114<br>977 |                                                                             | <a href="#">nucleic acid binding</a><br><a href="#">nucleus</a><br><a href="#">zinc ion binding</a>                                                                |  | 2.12 |
| <a href="#">233085_s_at</a> | FLJ2283<br>3  |                                                                             | <a href="#">nucleic acid binding</a><br><a href="#">DNA binding</a>                                                                                                |  | 5.14 |
| <a href="#">232080_at</a>   | HECW2         | HECT, C2 and<br>WW domain<br>containing E3<br>ubiquitin protein<br>ligase 2 | <a href="#">ubiquitin-protein ligase activity</a><br><a href="#">intracellular</a><br><a href="#">ubiquitin cycle</a>                                              |  | 2.22 |
| <a href="#">227443_at</a>   | C9orf150      | chromosome 9<br>open reading<br>frame 150                                   |                                                                                                                                                                    |  | 3.10 |
| <a href="#">227551_at</a>   | C9orf77       | chromosome 9<br>open reading<br>frame 77                                    | <a href="#">catalytic activity</a>                                                                                                                                 |  | 3.47 |

|                           |             |                                                       |                                                                                                                                                                                                                                                                                                                     |                                                                                                                                                                                                                |      |
|---------------------------|-------------|-------------------------------------------------------|---------------------------------------------------------------------------------------------------------------------------------------------------------------------------------------------------------------------------------------------------------------------------------------------------------------------|----------------------------------------------------------------------------------------------------------------------------------------------------------------------------------------------------------------|------|
| <a href="#">243908_at</a> | ZNF638      | zinc finger protein 638                               | <a href="#">nucleotide binding</a><br><a href="#">nucleic acid binding</a><br><a href="#">double-stranded DNA binding</a><br><a href="#">RNA binding</a><br><a href="#">nucleus</a><br><a href="#">nucleoplasm</a><br><a href="#">cytoplasm</a><br><a href="#">zinc ion binding</a><br><a href="#">RNA splicing</a> |                                                                                                                                                                                                                | 1.86 |
| <a href="#">241905_at</a> | PIK3C2<br>A | phosphoinositide-3-kinase, class 2, alpha polypeptide | <a href="#">inositol/phosphatidylinositol kinase activity</a><br><a href="#">phosphoinositide 3-kinase complex</a><br><a href="#">phosphatidylinositol biosynthesis</a><br><a href="#">intracellular signaling cascade</a><br><a href="#">phosphatidylinositol 3-kinase activity</a>                                | <a href="#">Phosphatidylinositol signaling system</a><br><a href="#">Apoptosis</a><br><a href="#">Toll-like receptor signaling pathway</a><br><a href="#">Jak-STAT signaling pathway</a><br><a href="#">NA</a> | 3.57 |
| <a href="#">228038_at</a> | SOX2        | SRY (sex determining region Y)-box 2                  | <a href="#">transcription factor activity</a><br><a href="#">nucleus</a><br><a href="#">establishment and/or maintenance of chromatin architecture</a><br><a href="#">transcription</a><br><a href="#">regulation of transcription, DNA-dependent</a>                                                               |                                                                                                                                                                                                                | 2.68 |

|                            |        |                                               |                                                                                                                                                                                                                                                        |                                                                                                                                    |      |
|----------------------------|--------|-----------------------------------------------|--------------------------------------------------------------------------------------------------------------------------------------------------------------------------------------------------------------------------------------------------------|------------------------------------------------------------------------------------------------------------------------------------|------|
| <a href="#">232392_at</a>  | SFRS3  | splicing factor, arginine/serine-rich 3       | <a href="#">nuclear mRNA splicing, via spliceosome</a><br><a href="#">nucleic acid binding</a><br><a href="#">RNA binding</a><br><a href="#">nucleus</a>                                                                                               |                                                                                                                                    | 2.87 |
| <a href="#">231644_at</a>  |        |                                               |                                                                                                                                                                                                                                                        |                                                                                                                                    | 2.71 |
| <a href="#">1553349_at</a> | ARID2  | AT rich interactive domain 2 (ARID, RFX-like) | <a href="#">nucleic acid binding</a><br><a href="#">translation initiation factor activity</a><br><a href="#">nucleus</a><br><a href="#">zinc ion binding</a>                                                                                          |                                                                                                                                    | 2.22 |
| <a href="#">219662_at</a>  | MGC509 |                                               |                                                                                                                                                                                                                                                        |                                                                                                                                    | 1.61 |
| <a href="#">232472_at</a>  |        |                                               |                                                                                                                                                                                                                                                        |                                                                                                                                    | 2.67 |
| <a href="#">241775_at</a>  | SCFD1  | sec1 family domain containing 1               | <a href="#">catalytic activity</a><br><a href="#">endoplasmic reticulum</a><br><a href="#">Golgi apparatus</a><br><a href="#">vesicle docking during exocytosis</a><br><a href="#">protein transport</a><br><a href="#">vesicle-mediated transport</a> |                                                                                                                                    | 4.78 |
| <a href="#">1556568_at</a> | NLK    | nemo like kinase                              | <a href="#">magnesium ion binding</a><br><a href="#">protein serine/threonine kinase activity</a><br><a href="#">MAP kinase activity</a><br><a href="#">ATP binding</a>                                                                                | <a href="#">MAPK signaling pathway</a><br><a href="#">Wnt signaling pathway</a><br><a href="#">Cadherin-mediated cell adhesion</a> | 2.05 |

|                            |          |                                                                                              |                                                                                                                                                                                                                                                                                                        |  |      |
|----------------------------|----------|----------------------------------------------------------------------------------------------|--------------------------------------------------------------------------------------------------------------------------------------------------------------------------------------------------------------------------------------------------------------------------------------------------------|--|------|
|                            |          |                                                                                              | <a href="#">nucleus</a><br><a href="#">regulation of transcription, DNA-dependent</a><br><a href="#">protein amino acid phosphorylation</a><br><a href="#">protein kinase cascade</a><br><a href="#">transferase activity</a><br><a href="#">negative regulation of Wnt receptor signaling pathway</a> |  |      |
| <a href="#">239695 at</a>  | KIAA1579 |                                                                                              | <a href="#">nucleotide binding</a><br><a href="#">nucleic acid binding</a>                                                                                                                                                                                                                             |  | 2.04 |
| <a href="#">1556989 at</a> | ADAMTS9  | a disintegrin-like and metalloprotease (reprolysin type) with thrombospondin type 1 motif, 9 | <a href="#">metalloendopeptidase activity</a><br><a href="#">extracellular matrix</a><br><a href="#">glycoprotein catabolism</a><br><a href="#">development</a><br><a href="#">zinc ion binding</a>                                                                                                    |  | 2.85 |
| <a href="#">228723 at</a>  | SDFR1    | stromal cell derived factor receptor 1                                                       | <a href="#">receptor activity</a><br><a href="#">mannose binding</a><br><a href="#">membrane</a>                                                                                                                                                                                                       |  | 1.61 |
| <a href="#">208054 at</a>  | HERC4    | hect domain and RLD 4                                                                        | <a href="#">ubiquitin-protein ligase activity</a><br><a href="#">intracellular</a><br><a href="#">ubiquitin cycle</a>                                                                                                                                                                                  |  | 1.63 |
| <a href="#">238558 at</a>  | MBNL1    | muscleblind-like                                                                             | <a href="#">embryonic development (sensu Mammalia)</a>                                                                                                                                                                                                                                                 |  | 1.87 |

|                             |       |                                      |                                                                                                                                                                                                                                                                                                                                                        |  |      |
|-----------------------------|-------|--------------------------------------|--------------------------------------------------------------------------------------------------------------------------------------------------------------------------------------------------------------------------------------------------------------------------------------------------------------------------------------------------------|--|------|
|                             |       | (Drosophila)                         | <a href="#">nucleic acid binding</a><br><a href="#">double-stranded RNA binding</a><br><a href="#">nucleus</a><br><a href="#">nucleus</a><br><a href="#">cytoplasm</a><br><a href="#">neurogenesis</a><br><a href="#">muscle development</a><br><a href="#">embryonic limb morphogenesis</a><br><a href="#">myoblast differentiation</a>               |  |      |
| <a href="#">231871_at</a>   | ITR   |                                      | <a href="#">receptor activity</a>                                                                                                                                                                                                                                                                                                                      |  | 1.74 |
| <a href="#">204012_s_at</a> | LCMT2 | leucine carboxyl methyltransferase 2 | <a href="#">protein binding</a><br><a href="#">methyltransferase activity</a><br><a href="#">transferase activity</a>                                                                                                                                                                                                                                  |  | 3.42 |
| <a href="#">224822_at</a>   | DLC1  | deleted in liver cancer 1            | <a href="#">Rho GTPase activator activity</a><br><a href="#">protein binding</a><br><a href="#">extracellular</a><br><a href="#">cytoplasm</a><br><a href="#">cytoskeleton organization and biogenesis</a><br><a href="#">signal transduction</a><br><a href="#">regulation of cell adhesion</a><br><a href="#">negative regulation of cell growth</a> |  | 5.21 |
| <a href="#">228993_s</a>    | PDCD4 | programmed cell                      | <a href="#">apoptosis</a>                                                                                                                                                                                                                                                                                                                              |  | 1.50 |

|                            |        |                                                  |                                                                                                                                                                                                                                                                                   |                                                                                                                                                                                                                                                                                                                                                                                                  |      |
|----------------------------|--------|--------------------------------------------------|-----------------------------------------------------------------------------------------------------------------------------------------------------------------------------------------------------------------------------------------------------------------------------------|--------------------------------------------------------------------------------------------------------------------------------------------------------------------------------------------------------------------------------------------------------------------------------------------------------------------------------------------------------------------------------------------------|------|
| <a href="#">at</a>         |        | death 4<br>(neoplastic transformation inhibitor) |                                                                                                                                                                                                                                                                                   |                                                                                                                                                                                                                                                                                                                                                                                                  |      |
| <a href="#">232865 at</a>  | AF5Q31 |                                                  | <a href="#">transcription factor activity</a><br><a href="#">transcription from Pol II promoter</a>                                                                                                                                                                               |                                                                                                                                                                                                                                                                                                                                                                                                  | 2.62 |
| <a href="#">230206 at</a>  | DOCK5  | dedicator of cytokinesis 5                       | <a href="#">guanyl-nucleotide exchange factor activity</a><br><a href="#">GTP binding</a><br><a href="#">GTPase binding</a>                                                                                                                                                       |                                                                                                                                                                                                                                                                                                                                                                                                  | 2.90 |
| <a href="#">239731 at</a>  |        |                                                  |                                                                                                                                                                                                                                                                                   |                                                                                                                                                                                                                                                                                                                                                                                                  | 2.39 |
| <a href="#">1558467 at</a> | UGCGL2 | UDP-glucose ceramide glucosyltransferase-like 2  | <a href="#">UDP-glucose:glycoprotein glucosyltransferase activity</a><br><a href="#">protein binding</a><br><a href="#">endoplasmic reticulum lumen</a><br><a href="#">protein amino acid glycosylation</a><br><a href="#">transferase activity, transferring glycosyl groups</a> | <a href="#">Fructose and mannose metabolism</a><br><a href="#">N-Glycans biosynthesis</a><br><a href="#">O-Glycans biosynthesis</a><br><a href="#">NA</a><br><a href="#">Glycerolipid metabolism</a><br><a href="#">Glycosylphosphatidylinositol(GPI)-anchor biosynthesis</a><br><a href="#">Glycosphingolipid metabolism</a><br><a href="#">Blood group glycolipid biosynthesis-lactoseries</a> | 2.38 |

|                                                |         |                                                                           |                                                                                                                                                                                                                                                                                                                                                                                                                                          |                                                                                                                                                        |      |
|------------------------------------------------|---------|---------------------------------------------------------------------------|------------------------------------------------------------------------------------------------------------------------------------------------------------------------------------------------------------------------------------------------------------------------------------------------------------------------------------------------------------------------------------------------------------------------------------------|--------------------------------------------------------------------------------------------------------------------------------------------------------|------|
|                                                |         |                                                                           |                                                                                                                                                                                                                                                                                                                                                                                                                                          | <a href="#">Blood group glycolipid biosynthesis-neolactoseries</a><br><a href="#">Globoside metabolism</a><br><a href="#">Ganglioside biosynthesis</a> |      |
| <a href="#">201865_x</a><br><a href="#">at</a> | NR3C1   | nuclear receptor subfamily 3, group C, member 1 (glucocorticoid receptor) | <a href="#">transcription factor activity</a><br><a href="#">glucocorticoid receptor activity</a><br><a href="#">steroid binding</a><br><a href="#">nucleus</a><br><a href="#">cytoplasm</a><br><a href="#">mitochondrial matrix</a><br><a href="#">regulation of transcription, DNA-dependent</a><br><a href="#">transcription from Pol II promoter</a><br><a href="#">inflammatory response</a><br><a href="#">signal transduction</a> | <a href="#">Neuroactive ligand-receptor interaction</a>                                                                                                | 4.11 |
| <a href="#">238549_at</a>                      | CBFA2T2 | core-binding factor, runt domain, alpha subunit 2, translocated to, 2     | <a href="#">transcription factor activity</a><br><a href="#">transcription cofactor activity</a><br><a href="#">nucleus</a><br><a href="#">regulation of transcription, DNA-dependent</a><br><a href="#">cell proliferation</a>                                                                                                                                                                                                          |                                                                                                                                                        | 2.71 |
| <a href="#">226807_at</a>                      | ZFP1    | zinc finger protein 1 homolog (mouse)                                     | <a href="#">DNA binding</a><br><a href="#">nucleus</a><br><a href="#">transcription</a>                                                                                                                                                                                                                                                                                                                                                  |                                                                                                                                                        | 2.45 |



|                           |              |                                                                    |                                                                                                                                                                                                                                                                                           |                                                                                                              |      |
|---------------------------|--------------|--------------------------------------------------------------------|-------------------------------------------------------------------------------------------------------------------------------------------------------------------------------------------------------------------------------------------------------------------------------------------|--------------------------------------------------------------------------------------------------------------|------|
|                           |              |                                                                    | <a href="#">regulation of transcription, DNA-dependent</a><br><a href="#">zinc ion binding</a>                                                                                                                                                                                            |                                                                                                              |      |
| <a href="#">240502 at</a> | MGC141<br>61 |                                                                    | <a href="#">binding</a><br><a href="#">cytoplasm</a><br><a href="#">cytoskeleton</a><br><a href="#">cytoskeletal protein binding</a><br><a href="#">membrane</a>                                                                                                                          |                                                                                                              | 1.99 |
| <a href="#">219595 at</a> | ZNF26        | zinc finger<br>protein 26 (KOX<br>20)                              | <a href="#">nucleic acid binding</a><br><a href="#">nucleus</a><br><a href="#">regulation of transcription, DNA-dependent</a><br><a href="#">zinc ion binding</a>                                                                                                                         |                                                                                                              | 1.86 |
| <a href="#">222313 at</a> | CNOT2        | CCR4-NOT<br>transcription<br>complex, subunit<br>2                 | <a href="#">nucleus</a><br><a href="#">regulation of transcription, DNA-dependent</a><br><a href="#">regulation of global transcription from Pol II promoter</a><br><a href="#">RNA polymerase II transcription mediator activity</a><br><a href="#">transcription regulator activity</a> |                                                                                                              | 2.30 |
| <a href="#">227140 at</a> | INHBA        | inhibin, beta A<br>(activin A, activin<br>AB alpha<br>polypeptide) | <a href="#">skeletal development</a><br><a href="#">ovarian follicle development</a><br><a href="#">cytokine activity</a><br><a href="#">transforming growth factor beta receptor binding</a><br><a href="#">hormone activity</a><br><a href="#">protein binding</a>                      | <a href="#">Cytokine-cytokine receptor<br/>interaction</a><br><a href="#">TGF-beta signaling<br/>pathway</a> | 2.14 |

|  |  |                                                                                                                                                                                                                                                                                                                                                                                                                                                                                                                                                                                                                                                                                                                                                                                                                                                                                                                                                                                                                                                                                                                                                                                                                                                                                                                                                                                              |  |  |
|--|--|----------------------------------------------------------------------------------------------------------------------------------------------------------------------------------------------------------------------------------------------------------------------------------------------------------------------------------------------------------------------------------------------------------------------------------------------------------------------------------------------------------------------------------------------------------------------------------------------------------------------------------------------------------------------------------------------------------------------------------------------------------------------------------------------------------------------------------------------------------------------------------------------------------------------------------------------------------------------------------------------------------------------------------------------------------------------------------------------------------------------------------------------------------------------------------------------------------------------------------------------------------------------------------------------------------------------------------------------------------------------------------------------|--|--|
|  |  | <p><a href="#"><u>extracellular</u></a></p> <p><a href="#"><u>induction of apoptosis</u></a></p> <p><a href="#"><u>defense response</u></a></p> <p><a href="#"><u>cell cycle arrest</u></a></p> <p><a href="#"><u>cell surface receptor linked signal transduction</u></a></p> <p><a href="#"><u>cell-cell signaling</u></a></p> <p><a href="#"><u>neurogenesis</u></a></p> <p><a href="#"><u>mesoderm development</u></a></p> <p><a href="#"><u>growth factor activity</u></a></p> <p><a href="#"><u>response to external stimulus</u></a></p> <p><a href="#"><u>activin inhibitor activity</u></a></p> <p><a href="#"><u>cell differentiation</u></a></p> <p><a href="#"><u>erythrocyte differentiation</u></a></p> <p><a href="#"><u>growth</u></a></p> <p><a href="#"><u>negative regulation of phosphorylation</u></a></p> <p><a href="#"><u>hemoglobin biosynthesis</u></a></p> <p><a href="#"><u>negative regulation of interferon-gamma biosynthesis</u></a></p> <p><a href="#"><u>negative regulation of B-cell differentiation</u></a></p> <p><a href="#"><u>negative regulation of macrophage differentiation</u></a></p> <p><a href="#"><u>negative regulation of cell cycle</u></a></p> <p><a href="#"><u>positive regulation of follicle-stimulating hormone secretion</u></a></p> <p><a href="#"><u>negative regulation of follicle-stimulating hormone secretion</u></a></p> |  |  |
|--|--|----------------------------------------------------------------------------------------------------------------------------------------------------------------------------------------------------------------------------------------------------------------------------------------------------------------------------------------------------------------------------------------------------------------------------------------------------------------------------------------------------------------------------------------------------------------------------------------------------------------------------------------------------------------------------------------------------------------------------------------------------------------------------------------------------------------------------------------------------------------------------------------------------------------------------------------------------------------------------------------------------------------------------------------------------------------------------------------------------------------------------------------------------------------------------------------------------------------------------------------------------------------------------------------------------------------------------------------------------------------------------------------------|--|--|

|                                 |              |                                                                         |                                                                                                                                                                                                       |                                                                                                                                                                       |      |
|---------------------------------|--------------|-------------------------------------------------------------------------|-------------------------------------------------------------------------------------------------------------------------------------------------------------------------------------------------------|-----------------------------------------------------------------------------------------------------------------------------------------------------------------------|------|
| <a href="#">237483 at</a>       | PLEKH<br>A5  | pleckstrin<br>homology<br>domain<br>containing,<br>family A member<br>5 | <a href="#">biological process unknown</a><br><a href="#">phosphatidylinositol binding</a><br><a href="#">cellular component unknown</a>                                                              |                                                                                                                                                                       | 1.55 |
| <a href="#">230083 at</a>       | USP53        | ubiquitin specific<br>protease 53                                       | <a href="#">cysteine-type endopeptidase activity</a><br><a href="#">ubiquitin thiolesterase activity</a><br><a href="#">ubiquitin-dependent protein catabolism</a><br><a href="#">ubiquitin cycle</a> |                                                                                                                                                                       | 2.77 |
| <a href="#">213913 s<br/>at</a> | KIAA09<br>84 |                                                                         |                                                                                                                                                                                                       |                                                                                                                                                                       | 3.20 |
| <a href="#">233369 at</a>       | SOS2         | son of sevenless<br>homolog 2<br>(Drosophila)                           | <a href="#">DNA binding</a><br><a href="#">guanyl-nucleotide exchange factor activity</a><br><a href="#">small GTPase mediated signal transduction</a><br><a href="#">cellular component unknown</a>  | <a href="#">MAPK signaling pathway</a><br><a href="#">Integrin-mediated cell<br/>adhesion</a><br><a href="#">Jak-STAT signaling<br/>pathway</a><br><a href="#">NA</a> | 3.25 |
| <a href="#">218926 at</a>       | MYNN         | myoneurin                                                               | <a href="#">nucleic acid binding</a><br><a href="#">transcription factor activity</a><br><a href="#">protein binding</a><br><a href="#">nucleus</a>                                                   |                                                                                                                                                                       | 1.80 |

|                           |           |                                                        |                                                                                                                                                                                    |  |      |
|---------------------------|-----------|--------------------------------------------------------|------------------------------------------------------------------------------------------------------------------------------------------------------------------------------------|--|------|
|                           |           |                                                        | <a href="#">transcription, DNA-dependent</a><br><a href="#">regulation of transcription, DNA-dependent</a><br><a href="#">zinc ion binding</a><br><a href="#">zinc ion binding</a> |  |      |
| <a href="#">229366 at</a> | CRBN      | cereblon                                               | <a href="#">ATP-dependent peptidase activity</a><br><a href="#">mitochondrion</a><br><a href="#">ATP-dependent proteolysis</a>                                                     |  | 2.59 |
| <a href="#">229483 at</a> | UBE2H     | ubiquitin-conjugating enzyme E2H (UBC8 homolog, yeast) | <a href="#">ubiquitin conjugating enzyme activity</a><br><a href="#">ubiquitin-protein ligase activity</a><br><a href="#">ubiquitin cycle</a><br><a href="#">ligase activity</a>   |  | 2.29 |
| <a href="#">232778 at</a> | C10orf18  | chromosome 10 open reading frame 18                    |                                                                                                                                                                                    |  | 2.04 |
| <a href="#">225956 at</a> | LOC153222 |                                                        | <a href="#">DNA binding</a><br><a href="#">nucleus</a><br><a href="#">regulation of transcription, DNA-dependent</a>                                                               |  | 4.73 |
| <a href="#">235436 at</a> | DDX31     | DEAD (Asp-Glu-Ala-Asp) box polypeptide 31              | <a href="#">nucleic acid binding</a><br><a href="#">ATP binding</a><br><a href="#">ATP-dependent helicase activity</a><br><a href="#">hydrolase activity</a>                       |  | 2.15 |

|                             |          |                                                                                                                                                  |                                                                                                                                                                                                                                                                                                                                                                                                                                                                                                                        |  |      |
|-----------------------------|----------|--------------------------------------------------------------------------------------------------------------------------------------------------|------------------------------------------------------------------------------------------------------------------------------------------------------------------------------------------------------------------------------------------------------------------------------------------------------------------------------------------------------------------------------------------------------------------------------------------------------------------------------------------------------------------------|--|------|
| <a href="#">217626_at</a>   | AKR1C2   | aldo-keto reductase family 1, member C2 (dihydrodiol dehydrogenase 2, bile acid binding protein, 3-alpha hydroxysteroid dehydrogenase, type III) | <a href="#">binding</a><br><a href="#">electron transporter activity</a><br><a href="#">lipid metabolism</a><br><a href="#">transport</a><br><a href="#">digestion</a><br><a href="#">steroid metabolism</a><br><a href="#">bile acid transporter activity</a><br><a href="#">canalicular bile acid transport</a><br><a href="#">oxidoreductase activity</a><br><a href="#">3-alpha-hydroxysteroid dehydrogenase (A-specific) activity</a><br><a href="#">trans-1,2-dihydrobenzene-1,2-diol dehydrogenase activity</a> |  | 2.20 |
| <a href="#">222853_at</a>   | FLRT3    | fibronectin leucine rich transmembrane protein 3                                                                                                 | <a href="#">receptor signaling protein activity</a><br><a href="#">extracellular matrix</a><br><a href="#">integral to plasma membrane</a><br><a href="#">cell adhesion</a><br><a href="#">protein binding, bridging</a>                                                                                                                                                                                                                                                                                               |  | 2.23 |
| <a href="#">225731_at</a>   | KIAA1223 |                                                                                                                                                  |                                                                                                                                                                                                                                                                                                                                                                                                                                                                                                                        |  | 3.08 |
| <a href="#">243691_at</a>   | KIAA0276 |                                                                                                                                                  |                                                                                                                                                                                                                                                                                                                                                                                                                                                                                                                        |  | 2.48 |
| <a href="#">213684_s_at</a> | PDLIM5   | PDZ and LIM domain 5                                                                                                                             | <a href="#">actin binding</a><br><a href="#">protein kinase C binding</a>                                                                                                                                                                                                                                                                                                                                                                                                                                              |  | 2.20 |

|                            |       |                               |                                                                                                                                                                                                                                                                                                                                                                                                    |                                                                            |      |
|----------------------------|-------|-------------------------------|----------------------------------------------------------------------------------------------------------------------------------------------------------------------------------------------------------------------------------------------------------------------------------------------------------------------------------------------------------------------------------------------------|----------------------------------------------------------------------------|------|
|                            |       |                               | <a href="#">protein binding</a><br><a href="#">membrane fraction</a><br><a href="#">cytosol</a><br><a href="#">heart development</a><br><a href="#">zinc ion binding</a><br><a href="#">receptor signaling complex scaffold activity</a><br><a href="#">actinin binding</a>                                                                                                                        |                                                                            |      |
| <a href="#">226075_at</a>  | SSB1  |                               | <a href="#">intracellular signaling cascade</a>                                                                                                                                                                                                                                                                                                                                                    |                                                                            | 1.87 |
| <a href="#">239862_at</a>  | TPD52 | tumor protein D52             | <a href="#">morphogenesis</a>                                                                                                                                                                                                                                                                                                                                                                      |                                                                            | 2.48 |
| <a href="#">241681_at</a>  | MBNL1 | muscleblind-like (Drosophila) | <a href="#">embryonic development (sensu Mammalia)</a><br><a href="#">nucleic acid binding</a><br><a href="#">double-stranded RNA binding</a><br><a href="#">nucleus</a><br><a href="#">nucleus</a><br><a href="#">cytoplasm</a><br><a href="#">neurogenesis</a><br><a href="#">muscle development</a><br><a href="#">embryonic limb morphogenesis</a><br><a href="#">myoblast differentiation</a> |                                                                            | 2.49 |
| <a href="#">1553994_at</a> | NT5E  | 5'-nucleotidase, ecto (CD73)  | <a href="#">nucleotide binding</a><br><a href="#">membrane fraction</a>                                                                                                                                                                                                                                                                                                                            | <a href="#">Purine metabolism</a><br><a href="#">Pyrimidine metabolism</a> | 2.77 |

|                           |        |                                                             |                                                                                                                                                                                                                                                                                                                                                                                       |                                                                                                                                                                                                                                     |      |
|---------------------------|--------|-------------------------------------------------------------|---------------------------------------------------------------------------------------------------------------------------------------------------------------------------------------------------------------------------------------------------------------------------------------------------------------------------------------------------------------------------------------|-------------------------------------------------------------------------------------------------------------------------------------------------------------------------------------------------------------------------------------|------|
|                           |        |                                                             | <a href="#">DNA metabolism</a><br><a href="#">5'-nucleotidase activity</a><br><a href="#">nucleotide catabolism</a><br><a href="#">membrane</a><br><a href="#">hydrolase activity, acting on ester bonds</a>                                                                                                                                                                          | <a href="#">Nicotinate and nicotinamide metabolism</a>                                                                                                                                                                              |      |
| <a href="#">229022 at</a> | ZFX    | zinc finger protein, X-linked                               | <a href="#">DNA binding</a><br><a href="#">DNA binding</a><br><a href="#">transcription coactivator activity</a><br><a href="#">nucleus</a><br><a href="#">regulation of transcription, DNA-dependent</a><br><a href="#">zinc ion binding</a><br><a href="#">transcription regulator activity</a><br><a href="#">regulation of transcription</a><br><a href="#">metal ion binding</a> |                                                                                                                                                                                                                                     | 1.72 |
| <a href="#">239476 at</a> | PIK3R1 | phosphoinositide-3-kinase, regulatory subunit 1 (p85 alpha) | <a href="#">phosphatidylinositol binding</a><br><a href="#">phosphoinositide 3-kinase complex</a><br><a href="#">intracellular signaling cascade</a><br><a href="#">intracellular signaling cascade</a><br><a href="#">kinase activity</a><br><a href="#">phosphatidylinositol 3-kinase activity</a><br><a href="#">phosphatidylinositol 3-kinase activity</a>                        | <a href="#">Phosphatidylinositol signaling system</a><br><a href="#">Apoptosis</a><br><a href="#">Integrin-mediated cell adhesion</a><br><a href="#">Toll-like receptor signaling pathway</a><br><a href="#">Jak-STAT signaling</a> | 3.47 |

|                           |              |                                                     |                                                                                                                                                                                                                                                                                                      | <a href="#">pathway</a> |      |
|---------------------------|--------------|-----------------------------------------------------|------------------------------------------------------------------------------------------------------------------------------------------------------------------------------------------------------------------------------------------------------------------------------------------------------|-------------------------|------|
|                           |              |                                                     |                                                                                                                                                                                                                                                                                                      | <a href="#">NA</a>      |      |
| <a href="#">213065 at</a> | MGC234<br>01 |                                                     | <a href="#">nucleus</a><br><a href="#">mRNA processing</a>                                                                                                                                                                                                                                           |                         | 2.53 |
| <a href="#">233112 at</a> | C9orf150     | chromosome 9<br>open reading<br>frame 150           |                                                                                                                                                                                                                                                                                                      |                         | 2.99 |
| <a href="#">240655 at</a> | ALCAM        | activated<br>leukocyte cell<br>adhesion<br>molecule | <a href="#">receptor binding</a><br><a href="#">protein binding</a><br><a href="#">membrane fraction</a><br><a href="#">integral to plasma membrane</a><br><a href="#">cell adhesion</a><br><a href="#">signal transduction</a><br><a href="#">antimicrobial humoral response (sensu Vertebrata)</a> |                         | 2.25 |
| <a href="#">41329 at</a>  | SCYL3        | SCY1-like 3 (S.<br>cerevisiae)                      | <a href="#">protein serine/threonine kinase activity</a><br><a href="#">ATP binding</a><br><a href="#">Golgi apparatus</a><br><a href="#">protein amino acid phosphorylation</a>                                                                                                                     |                         | 2.10 |
| <a href="#">235757 at</a> | C10orf18     | chromosome 10<br>open reading<br>frame 18           |                                                                                                                                                                                                                                                                                                      |                         | 2.36 |
| <a href="#">213743 at</a> | CCNT2        | cyclin T2                                           | <a href="#">regulation of cell cycle</a>                                                                                                                                                                                                                                                             |                         | 3.16 |



|                           |        |                                             |                                                                                                                                                                                                                                                                                                                                                                                                      |                    |      |
|---------------------------|--------|---------------------------------------------|------------------------------------------------------------------------------------------------------------------------------------------------------------------------------------------------------------------------------------------------------------------------------------------------------------------------------------------------------------------------------------------------------|--------------------|------|
|                           |        |                                             | <a href="#">regulation of cyclin dependent protein kinase activity</a><br><a href="#">cytokinesis</a><br><a href="#">nucleus</a><br><a href="#">transcription</a><br><a href="#">regulation of transcription, DNA-dependent</a><br><a href="#">transcription from Pol II promoter</a>                                                                                                                |                    |      |
| <a href="#">232017 at</a> | TJP2   | tight junction protein 2 (zona occludens 2) | <a href="#">guanylate kinase activity</a><br><a href="#">protein binding</a><br><a href="#">nucleus</a><br><a href="#">integral to plasma membrane</a><br><a href="#">tight junction</a><br><a href="#">membrane</a>                                                                                                                                                                                 | <a href="#">NA</a> | 1.90 |
| <a href="#">216022 at</a> | WNK1   | WNK lysine deficient protein kinase 1       | <a href="#">protein serine/threonine kinase activity</a><br><a href="#">protein kinase inhibitor activity</a><br><a href="#">ATP binding</a><br><a href="#">cytoplasm</a><br><a href="#">protein amino acid phosphorylation</a><br><a href="#">ion transport</a><br><a href="#">protein kinase cascade</a><br><a href="#">transferase activity</a><br><a href="#">regulation of cellular process</a> |                    | 2.30 |
| <a href="#">235648 at</a> | ZNF567 | zinc finger                                 | <a href="#">nucleic acid binding</a>                                                                                                                                                                                                                                                                                                                                                                 |                    | 3.43 |

|                                |          |                                    |                                                                                                                                                                                                                                                                                          |  |      |
|--------------------------------|----------|------------------------------------|------------------------------------------------------------------------------------------------------------------------------------------------------------------------------------------------------------------------------------------------------------------------------------------|--|------|
|                                |          | protein 567                        | <a href="#">nucleus</a><br><a href="#">regulation of transcription, DNA-dependent</a><br><a href="#">zinc ion binding</a>                                                                                                                                                                |  |      |
| <a href="#">226588</a> at      | KIAA1604 |                                    | <a href="#">RNA binding</a>                                                                                                                                                                                                                                                              |  | 2.29 |
| <a href="#">240594</a> at      | CDYL     | chromodomain protein, Y-like       | <a href="#">chromatin</a><br><a href="#">chromatin binding</a><br><a href="#">catalytic activity</a><br><a href="#">nucleus</a><br><a href="#">chromatin assembly/disassembly</a><br><a href="#">spermatogenesis</a><br><a href="#">metabolism</a><br><a href="#">peptidase activity</a> |  | 3.04 |
| <a href="#">222872</a> x<br>at | FLJ22833 |                                    | <a href="#">nucleic acid binding</a><br><a href="#">DNA binding</a>                                                                                                                                                                                                                      |  | 4.61 |
| <a href="#">222728</a> s<br>at | MGC5306  |                                    |                                                                                                                                                                                                                                                                                          |  | 1.92 |
| <a href="#">222282</a> at      | PAPD4    | PAP associated domain containing 4 | <a href="#">nucleic acid binding</a>                                                                                                                                                                                                                                                     |  | 1.78 |
| <a href="#">236153</a> at      |          |                                    |                                                                                                                                                                                                                                                                                          |  | 1.65 |
| <a href="#">225914</a> s       | CAB39L   | calcium binding                    | <a href="#">binding</a>                                                                                                                                                                                                                                                                  |  | 2.14 |

|                                                |              |                                                                               |                                                                                                                                                                                                                                                                                                                                                                                                     |                                              |      |
|------------------------------------------------|--------------|-------------------------------------------------------------------------------|-----------------------------------------------------------------------------------------------------------------------------------------------------------------------------------------------------------------------------------------------------------------------------------------------------------------------------------------------------------------------------------------------------|----------------------------------------------|------|
| <a href="#">at</a>                             |              | protein 39-like                                                               |                                                                                                                                                                                                                                                                                                                                                                                                     |                                              |      |
| <a href="#">218566_s</a><br><a href="#">at</a> | CHORD<br>C1  | cysteine and histidine-rich domain (CHORD)-containing, zinc binding protein 1 | <a href="#">biological process unknown</a><br><a href="#">molecular function unknown</a><br><a href="#">cellular component unknown</a>                                                                                                                                                                                                                                                              |                                              | 1.49 |
| <a href="#">224831_at</a>                      | CPEB4        | cytoplasmic polyadenylation element binding protein 4                         | <a href="#">nucleotide binding</a><br><a href="#">nucleic acid binding</a>                                                                                                                                                                                                                                                                                                                          |                                              | 4.57 |
| <a href="#">1560082_a</a><br><a href="#">t</a> | FLJ1407<br>5 |                                                                               |                                                                                                                                                                                                                                                                                                                                                                                                     |                                              | 1.97 |
| <a href="#">227038_at</a>                      | MGC269<br>63 |                                                                               | <a href="#">Golgi apparatus</a><br><a href="#">integral to plasma membrane</a><br><a href="#">lipid metabolism</a><br><a href="#">sphingolipid metabolism</a><br><a href="#">sphingomyelin biosynthesis</a><br><a href="#">kinase activity</a><br><a href="#">transferase activity</a><br><a href="#">integral to Golgi membrane</a><br><a href="#">ceramide cholinephosphotransferase activity</a> | <a href="#">Glycosphingolipid metabolism</a> | 2.59 |

|                              |              |                                              |                                                                                                                                                                                                                                                                                                                                         |                                                                        |      |
|------------------------------|--------------|----------------------------------------------|-----------------------------------------------------------------------------------------------------------------------------------------------------------------------------------------------------------------------------------------------------------------------------------------------------------------------------------------|------------------------------------------------------------------------|------|
| <a href="#">236472_at</a>    | NRD1         | nardilysin (N-arginine dibasic convertase)   | <a href="#">proteolysis and peptidolysis</a><br><a href="#">neuromuscular junction development</a><br><a href="#">cellular_component unknown</a><br><a href="#">nardilysin activity</a>                                                                                                                                                 |                                                                        | 2.59 |
| <a href="#">240788_at</a>    | ME1          | malic enzyme 1, NADP(+)-dependent, cytosolic | <a href="#">malate dehydrogenase (oxaloacetate-decarboxylating) (NADP+) activity</a><br><a href="#">electron transporter activity</a><br><a href="#">cytosol</a><br><a href="#">carbohydrate metabolism</a><br><a href="#">tricarboxylic acid cycle</a><br><a href="#">malate metabolism</a><br><a href="#">oxidoreductase activity</a> | <a href="#">Pyruvate metabolism</a><br><a href="#">Carbon fixation</a> | 2.30 |
| <a href="#">236265_at</a>    |              |                                              |                                                                                                                                                                                                                                                                                                                                         |                                                                        | 2.43 |
| <a href="#">1559401_a_at</a> | ZNF609       | zinc finger protein 609                      | <a href="#">nucleic acid binding</a><br><a href="#">nucleus</a><br><a href="#">zinc ion binding</a>                                                                                                                                                                                                                                     |                                                                        | 2.10 |
| <a href="#">223204_at</a>    | DKFZp434L142 |                                              |                                                                                                                                                                                                                                                                                                                                         |                                                                        | 2.85 |
| <a href="#">242225_at</a>    | KIAA1040     |                                              | <a href="#">binding</a><br><a href="#">mitochondrion</a><br><a href="#">mitotic chromosome condensation</a><br><a href="#">ATP synthesis coupled proton transport</a>                                                                                                                                                                   |                                                                        | 3.52 |

|                           |              |                                                   |                                                                                                                                                                                                                                                                                                           |                                                                                       |      |
|---------------------------|--------------|---------------------------------------------------|-----------------------------------------------------------------------------------------------------------------------------------------------------------------------------------------------------------------------------------------------------------------------------------------------------------|---------------------------------------------------------------------------------------|------|
|                           |              |                                                   | <a href="#">membrane</a><br><a href="#">proton-transporting two-sector ATPase complex</a><br><a href="#">hydrogen-transporting ATP synthase activity, rotational mechanism</a><br><a href="#">hydrogen-transporting ATPase activity, rotational mechanism</a>                                             |                                                                                       |      |
| <a href="#">232489 at</a> | FLJ1028<br>7 |                                                   | <a href="#">DNA binding</a>                                                                                                                                                                                                                                                                               |                                                                                       | 2.01 |
| <a href="#">239561 at</a> | THRAP2       | thyroid hormone receptor associated protein 2     | <a href="#">receptor activity</a>                                                                                                                                                                                                                                                                         |                                                                                       | 3.41 |
| <a href="#">243410 at</a> | PTPN2        | protein tyrosine phosphatase, non-receptor type 2 | <a href="#">protein tyrosine phosphatase activity</a><br><a href="#">protein tyrosine phosphatase activity</a><br><a href="#">receptor activity</a><br><a href="#">protein amino acid dephosphorylation</a><br><a href="#">protein amino acid dephosphorylation</a><br><a href="#">hydrolase activity</a> |                                                                                       | 2.18 |
| <a href="#">230769 at</a> | FLJ3709<br>9 |                                                   |                                                                                                                                                                                                                                                                                                           |                                                                                       | 2.04 |
| <a href="#">212990 at</a> | SYNJ1        | synaptojanin 1                                    | <a href="#">RNA binding</a><br><a href="#">inositol/phosphatidylinositol phosphatase activity</a><br><a href="#">phosphoinositide 5-phosphatase activity</a>                                                                                                                                              | <a href="#">Inositol phosphate metabolism</a><br><a href="#">Phosphatidylinositol</a> | 3.13 |

|                            |         |                                              |                                                                                                                                                                                                                                                                                                                                                                                                                                   |                                  |      |
|----------------------------|---------|----------------------------------------------|-----------------------------------------------------------------------------------------------------------------------------------------------------------------------------------------------------------------------------------------------------------------------------------------------------------------------------------------------------------------------------------------------------------------------------------|----------------------------------|------|
|                            |         |                                              | <a href="#">inositol-polyphosphate 5-phosphatase activity</a><br><a href="#">phosphate metabolism</a><br><a href="#">hydrolase activity</a>                                                                                                                                                                                                                                                                                       | <a href="#">signaling system</a> |      |
| <a href="#">236251_at</a>  |         |                                              |                                                                                                                                                                                                                                                                                                                                                                                                                                   |                                  | 3.73 |
| <a href="#">242059_at</a>  |         |                                              |                                                                                                                                                                                                                                                                                                                                                                                                                                   |                                  | 2.39 |
| <a href="#">1559020_at</a> |         |                                              |                                                                                                                                                                                                                                                                                                                                                                                                                                   |                                  | 1.82 |
| <a href="#">242029_at</a>  | FNDC3B  | fibronectin type III domain containing 3B    |                                                                                                                                                                                                                                                                                                                                                                                                                                   |                                  | 2.17 |
| <a href="#">220612_at</a>  | MGC4308 |                                              |                                                                                                                                                                                                                                                                                                                                                                                                                                   |                                  | 2.64 |
| <a href="#">244010_at</a>  | MLL3    | myeloid/lymphoid or mixed-lineage leukemia 3 | <a href="#">ubiquitin ligase complex</a><br><a href="#">DNA binding</a><br><a href="#">ubiquitin-protein ligase activity</a><br><a href="#">ATP binding</a><br><a href="#">nucleus</a><br><a href="#">transcription</a><br><a href="#">regulation of transcription, DNA-dependent</a><br><a href="#">methyltransferase activity</a><br><a href="#">zinc ion binding</a><br><a href="#">ATP synthesis coupled proton transport</a> |                                  | 3.09 |

|                              |               |                                     |                                                                                                                                                                                                                                                                                                                                                                                                                                                                   |      |
|------------------------------|---------------|-------------------------------------|-------------------------------------------------------------------------------------------------------------------------------------------------------------------------------------------------------------------------------------------------------------------------------------------------------------------------------------------------------------------------------------------------------------------------------------------------------------------|------|
|                              |               |                                     | <a href="#">proton-transporting two-sector ATPase complex</a><br><a href="#">protein ubiquitination</a><br><a href="#">chromatin modification</a><br><a href="#">transferase activity</a><br><a href="#">histone-lysine N-methyltransferase activity</a><br><a href="#">metal ion binding</a><br><a href="#">hydrogen-transporting ATP synthase activity, rotational mechanism</a><br><a href="#">hydrogen-transporting ATPase activity, rotational mechanism</a> |      |
| <a href="#">230205_at</a>    | ZNF561        | zinc finger protein 561             | <a href="#">nucleic acid binding</a><br><a href="#">nucleus</a><br><a href="#">zinc ion binding</a>                                                                                                                                                                                                                                                                                                                                                               | 1.57 |
| <a href="#">218761_at</a>    | RNF111        | ring finger protein 111             | <a href="#">ubiquitin ligase complex</a><br><a href="#">ubiquitin-protein ligase activity</a><br><a href="#">zinc ion binding</a><br><a href="#">protein ubiquitination</a>                                                                                                                                                                                                                                                                                       | 2.44 |
| <a href="#">233869_x_at</a>  | DKFZP586B0319 |                                     |                                                                                                                                                                                                                                                                                                                                                                                                                                                                   | 1.66 |
| <a href="#">1557238_s_at</a> | FLJ10707      |                                     |                                                                                                                                                                                                                                                                                                                                                                                                                                                                   | 2.41 |
| <a href="#">1565887_at</a>   | TRPM7         | transient receptor potential cation | <a href="#">protein serine/threonine kinase activity</a><br><a href="#">calcium channel activity</a>                                                                                                                                                                                                                                                                                                                                                              | 2.08 |

|                             |        |                                                                         |                                                                                                                                                                                                                                                                            |                                                    |      |
|-----------------------------|--------|-------------------------------------------------------------------------|----------------------------------------------------------------------------------------------------------------------------------------------------------------------------------------------------------------------------------------------------------------------------|----------------------------------------------------|------|
|                             |        | channel,<br>subfamily M,<br>member 7                                    | <a href="#">ATP binding</a><br><a href="#">protein amino acid phosphorylation</a><br><a href="#">cation transport</a><br><a href="#">calcium ion transport</a><br><a href="#">membrane</a><br><a href="#">integral to membrane</a><br><a href="#">transferase activity</a> |                                                    |      |
| <a href="#">232297_at</a>   |        |                                                                         |                                                                                                                                                                                                                                                                            |                                                    | 1.92 |
| <a href="#">244015_at</a>   | EIF4G3 | eukaryotic<br>translation<br>initiation factor 4<br>gamma, 3            | <a href="#">RNA cap binding</a><br><a href="#">translation initiation factor activity</a><br><a href="#">regulation of translational initiation</a><br><a href="#">eukaryotic translation initiation factor 4F complex</a>                                                 |                                                    | 1.83 |
| <a href="#">1556543_at</a>  |        |                                                                         |                                                                                                                                                                                                                                                                            |                                                    | 2.28 |
| <a href="#">243046_at</a>   | UBE2D3 | ubiquitin-<br>conjugating<br>enzyme E2D 3<br>(UBC4/5<br>homolog, yeast) | <a href="#">ubiquitin conjugating enzyme activity</a><br><a href="#">ubiquitin-protein ligase activity</a><br><a href="#">ubiquitin cycle</a><br><a href="#">ligase activity</a>                                                                                           | <a href="#">Ubiquitin mediated<br/>proteolysis</a> | 2.30 |
| <a href="#">235791_x_at</a> | CHD1   | chromodomain<br>helicase DNA<br>binding protein 1                       | <a href="#">chromatin</a><br><a href="#">chromatin binding</a><br><a href="#">ATP-dependent DNA helicase activity</a>                                                                                                                                                      |                                                    | 2.74 |



|                           |              |                                              |                                                                                                                                                                                                                                                                                                                                   |  |      |
|---------------------------|--------------|----------------------------------------------|-----------------------------------------------------------------------------------------------------------------------------------------------------------------------------------------------------------------------------------------------------------------------------------------------------------------------------------|--|------|
|                           |              |                                              | <a href="#">helicase activity</a><br><a href="#">ATP binding</a><br><a href="#">nucleus</a><br><a href="#">chromatin assembly/disassembly</a><br><a href="#">regulation of transcription from Pol II promoter</a><br><a href="#">chromosome organization and biogenesis (sensu Eukarya)</a><br><a href="#">hydrolase activity</a> |  |      |
| <a href="#">219284_at</a> | HSPBAP<br>1  | HSPB (heat shock 27kDa) associated protein 1 |                                                                                                                                                                                                                                                                                                                                   |  | 1.78 |
| <a href="#">228336_at</a> | KIAA19<br>35 |                                              |                                                                                                                                                                                                                                                                                                                                   |  | 1.82 |
| <a href="#">230296_at</a> | C16orf52     | chromosome 16 open reading frame 52          |                                                                                                                                                                                                                                                                                                                                   |  | 1.88 |
| <a href="#">222580_at</a> | ZNF644       | zinc finger protein 644                      | <a href="#">DNA binding</a><br><a href="#">nucleus</a><br><a href="#">transcription</a><br><a href="#">regulation of transcription, DNA-dependent</a><br><a href="#">zinc ion binding</a>                                                                                                                                         |  | 2.94 |
| <a href="#">239516_at</a> | LYPLAL       | lysophospholipas                             | <a href="#">lipid metabolism</a>                                                                                                                                                                                                                                                                                                  |  | 2.00 |

|                           |           |                                |                                                                                                                                                                                           |  |      |
|---------------------------|-----------|--------------------------------|-------------------------------------------------------------------------------------------------------------------------------------------------------------------------------------------|--|------|
|                           | 1         | e-like 1                       | <a href="#">fatty acid metabolism</a><br><a href="#">hydrolase activity</a>                                                                                                               |  |      |
| <a href="#">206648 at</a> | ZNF571    | zinc finger protein 571        | <a href="#">DNA binding</a><br><a href="#">nucleus</a><br><a href="#">regulation of transcription, DNA-dependent</a><br><a href="#">zinc ion binding</a>                                  |  | 1.96 |
| <a href="#">219854 at</a> | ZNF14     | zinc finger protein 14 (KOX 6) | <a href="#">DNA binding</a><br><a href="#">nucleus</a><br><a href="#">transcription</a><br><a href="#">regulation of transcription, DNA-dependent</a><br><a href="#">zinc ion binding</a> |  | 2.20 |
| <a href="#">215083 at</a> | PSPC1     | paraspeckle component 1        | <a href="#">nucleotide binding</a><br><a href="#">nucleic acid binding</a>                                                                                                                |  | 2.30 |
| <a href="#">227599 at</a> | LOC151963 |                                |                                                                                                                                                                                           |  | 3.70 |
| <a href="#">231940 at</a> | ZNF529    | zinc finger protein 529        | <a href="#">nucleic acid binding</a><br><a href="#">nucleus</a><br><a href="#">regulation of transcription, DNA-dependent</a><br><a href="#">zinc ion binding</a>                         |  | 3.68 |
