# Supplementary material
Source: PubMed Central journal article supplement (PMC2042178)

A

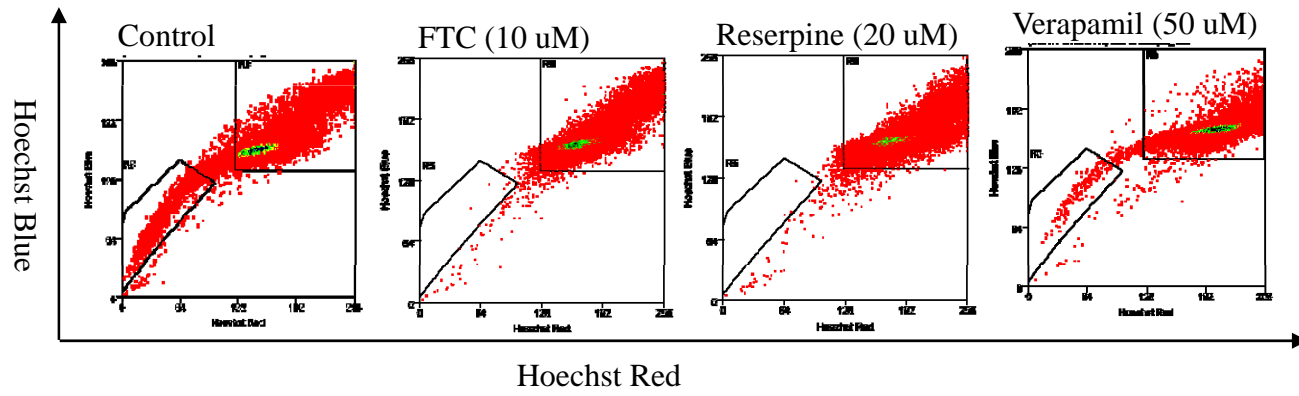

B

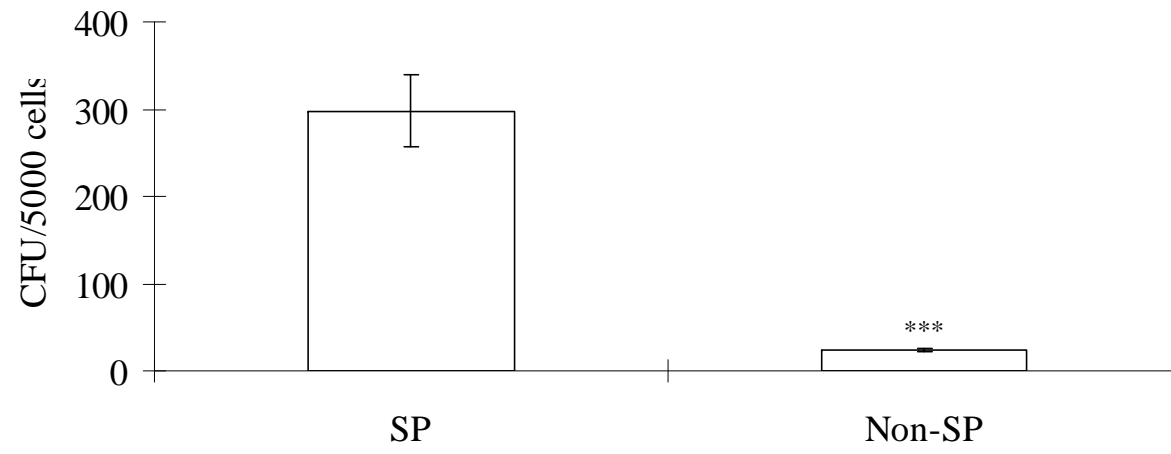

C

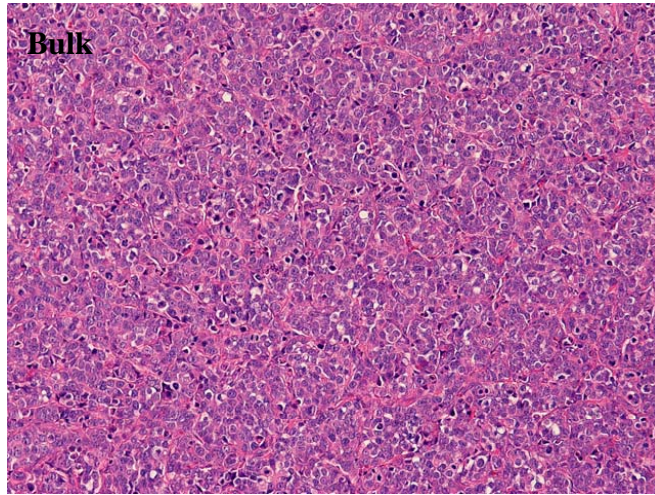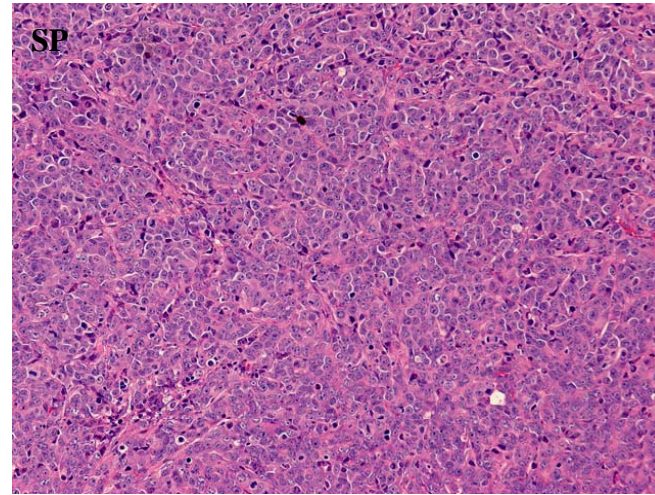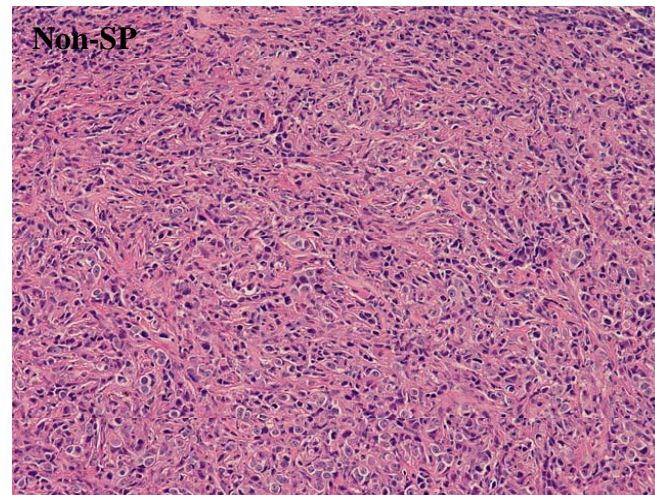

Supplement: pnas_0702596104_1.pdf [file pnas_0702596104_1.pdf]

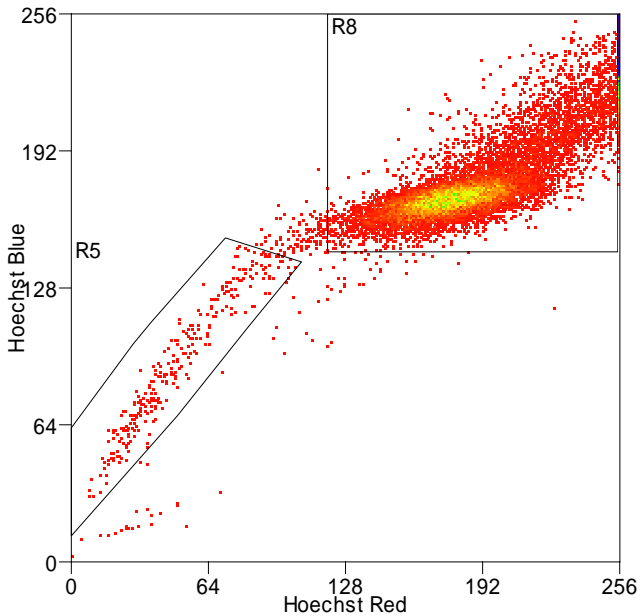

Supplement: pnas_0702596104_2.pdf [file pnas_0702596104_2.pdf]

A

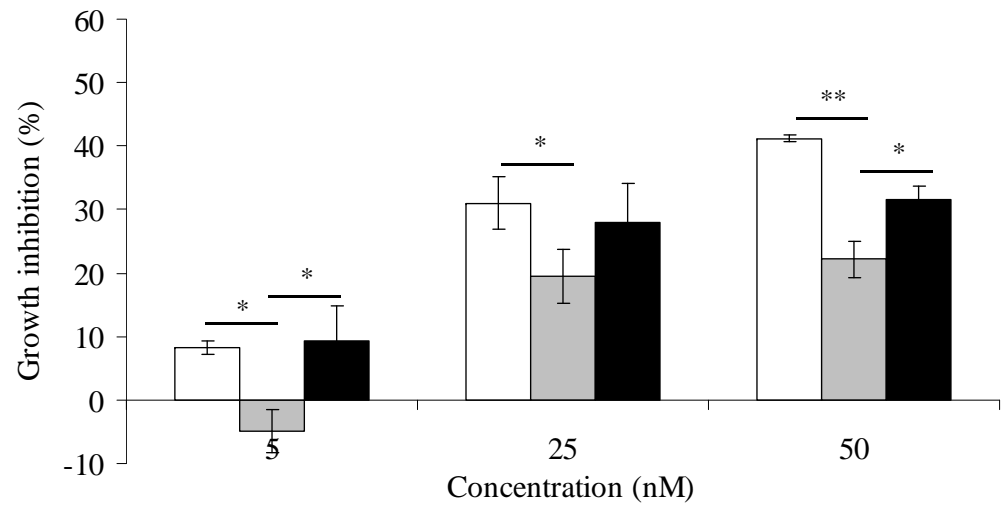

B

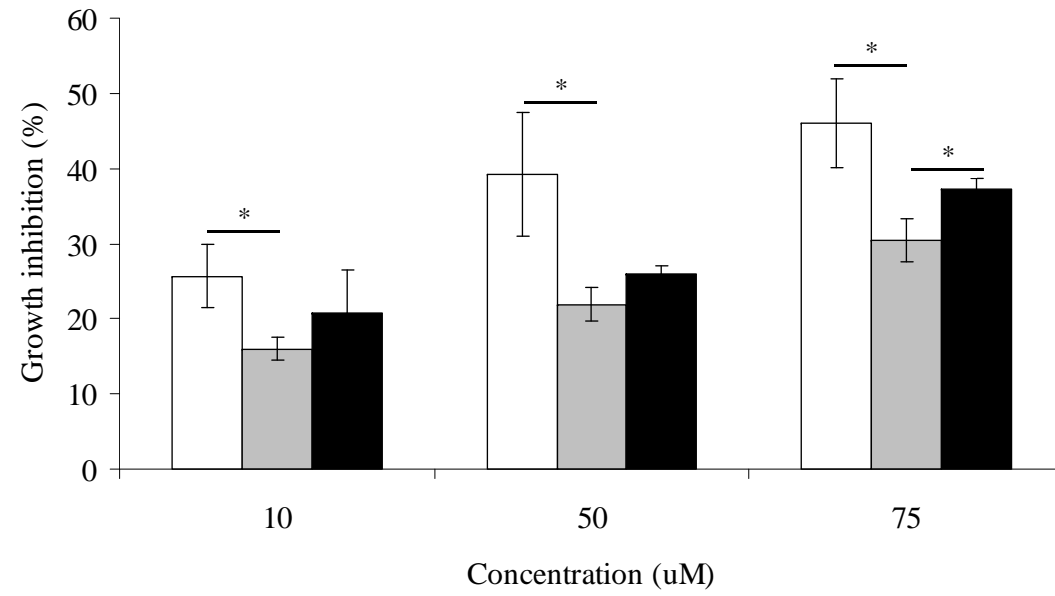

C

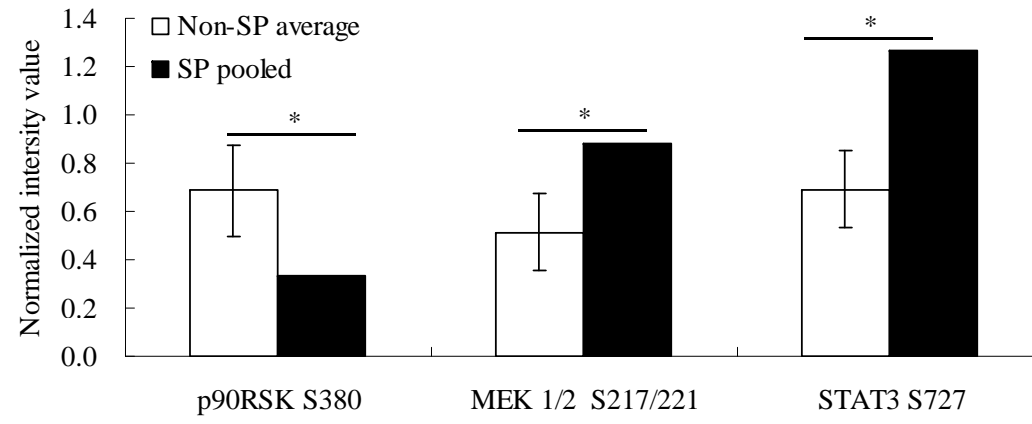

Supplement: pnas_0702596104_3.pdf [file pnas_0702596104_3.pdf]

Non-SP

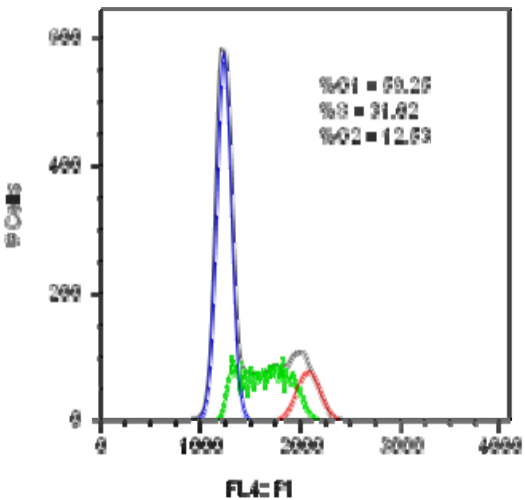

SP

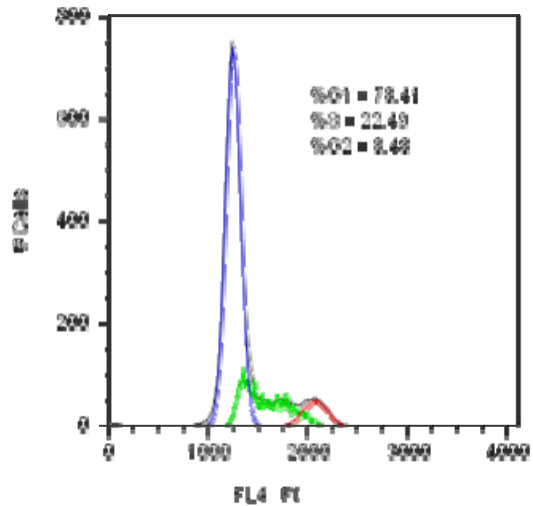

Supplement: pnas_0702596104_4.pdf [file pnas_0702596104_4.pdf]

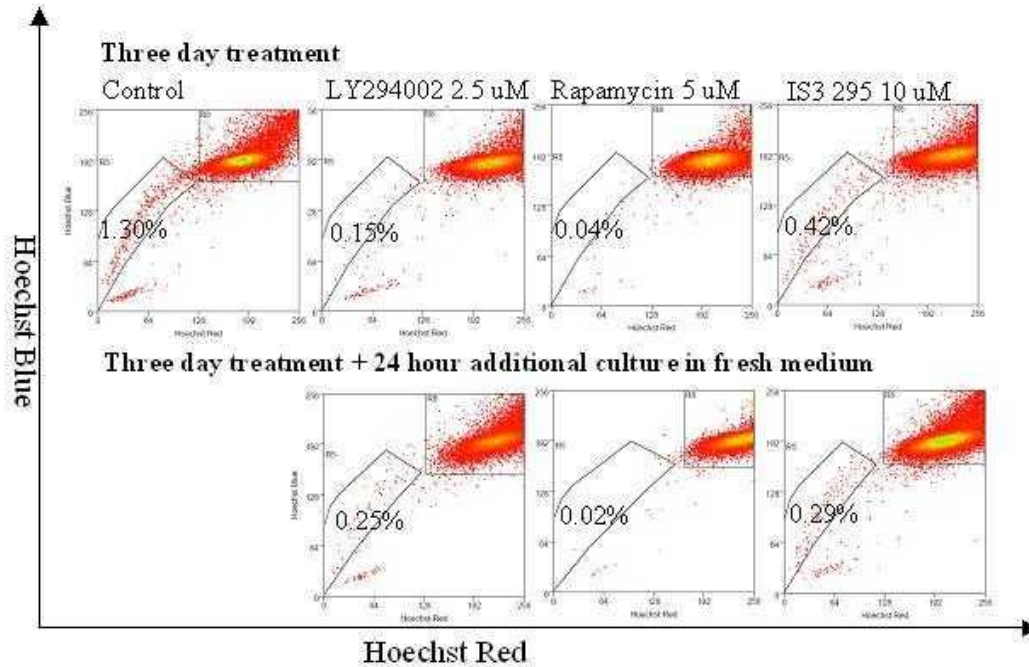

Supplement: pnas_0702596104_5.pdf [file pnas_0702596104_5.pdf]
